# Supplementary material for: Defining the CD39/CD73 Axis in SARS-CoV-2 Infection: The CD73- Phenotype Identifies Polyfunctional Cytotoxic Lymphocytes
Source: PubMed Central journal article supplement (PMC7464076; doi:10.3390/cells9081750), 2020-07-22
Supplement: cells-09-01750-s001.pdf [file cells-09-01750-s001.pdf]

Supplementary Material

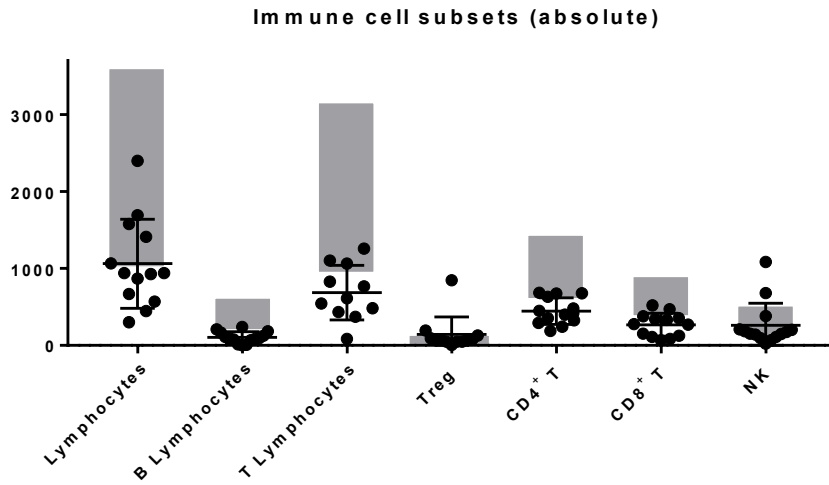

**Supplementary Figure S1:** Decreased cell numbers within leukocyte subsets. PBMC from COVID-19 patients were analyzed ex vivo by flow cytometry. Reference ranges of individual leukocyte subsets for healthy donors are shown in grey. Data are shown as mean  $\pm$  SD.

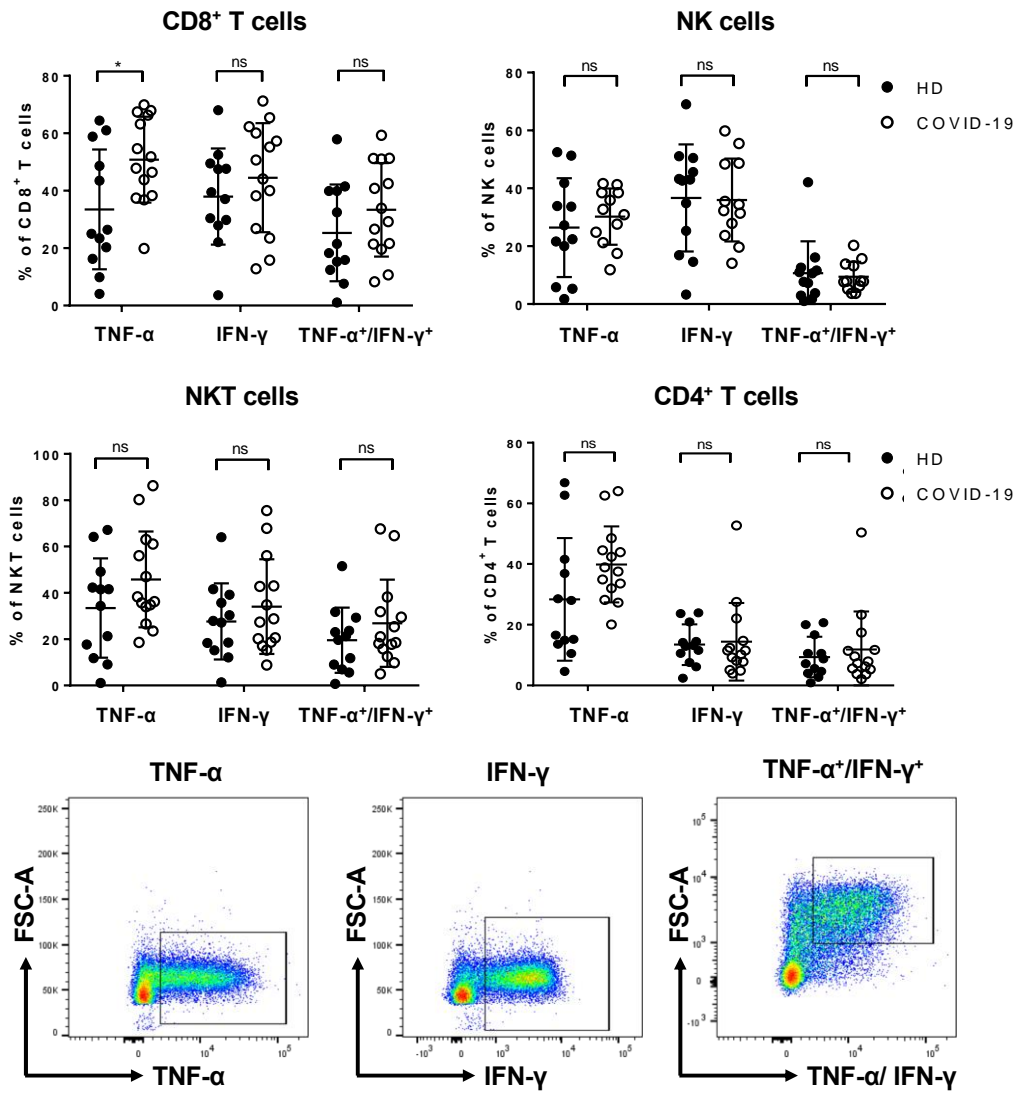

**Supplementary Figure S2:** Secretion of TNF- $\alpha$  and IFN- $\gamma$  by different leukocyte subsets in COVID-19 patients and healthy donors (HD). PBMC from COVID-19 patients and HD were stimulated ex vivo with PMA/ionomycin for 5h to analyze the frequency of cytokine producing cells by flow cytometry. Dot plots represent CD8<sup>+</sup> T cells from COVID-19 patients. The frequency of cytokine-producing cells in unstimulated samples was typically below 1%. Data are shown as mean  $\pm$  SD.

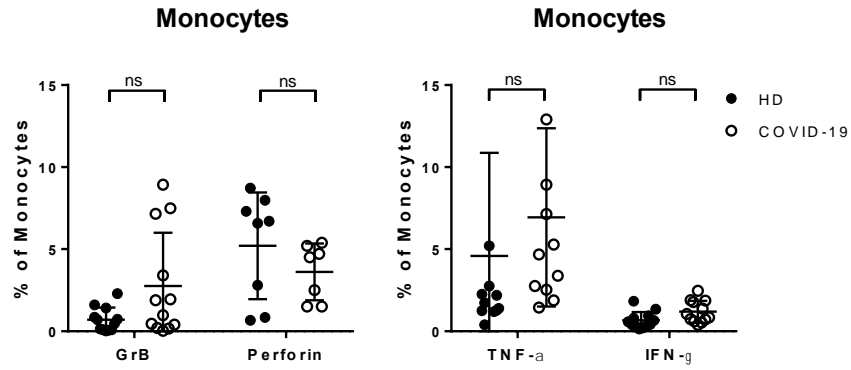

**Supplementary Figure S3:** Secretion of Granzyme B (GrB), perforin, TNF- $\alpha$  and IFN- $\gamma$  by monocytes. PBMC from COVID-19 patients and healthy donors (HD) were stimulated ex vivo with PMA/ionomycin for 5h. The frequency of cytokine-producing cells among monocytes was analyzed by flow cytometry. Data are shown as mean  $\pm$  SD.

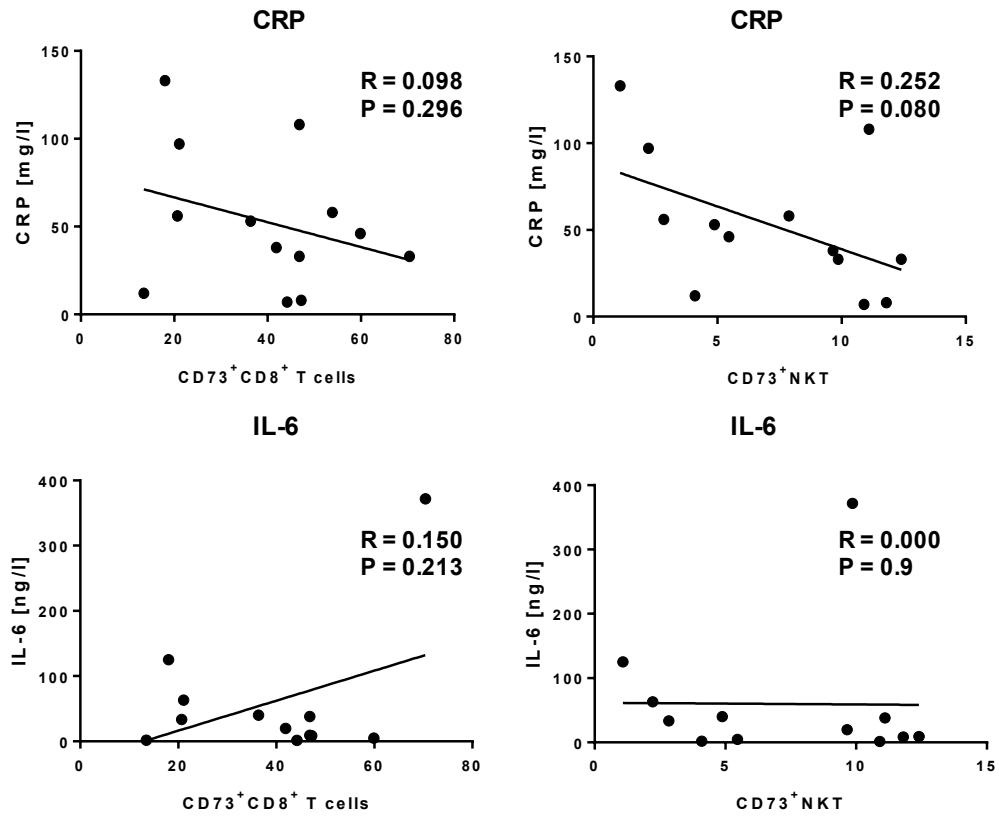

**Supplementary Figure S4:** Correlation of CD73 surface expression on CD8<sup>+</sup> T cells and NKT cells with CRP and IL-6.

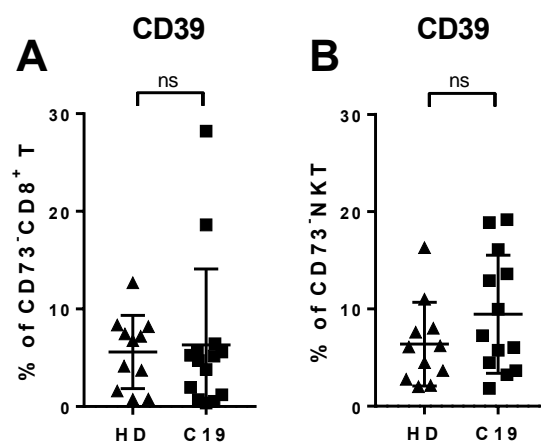

**Supplementary Figure S5:** CD39 surface expression on CD73<sup>-</sup>CD8<sup>+</sup> T cells and CD73<sup>-</sup>NKT cells. PBMCs from healthy donors (HD) and COVID-19 (C19) patients were analyzed ex vivo by flow cytometry and compared in regard to CD39 surface expression on CD73<sup>-</sup>CD8<sup>+</sup> T cells (**A**) and CD73<sup>-</sup>NKT cells (**B**). Data are shown as mean ± SD.

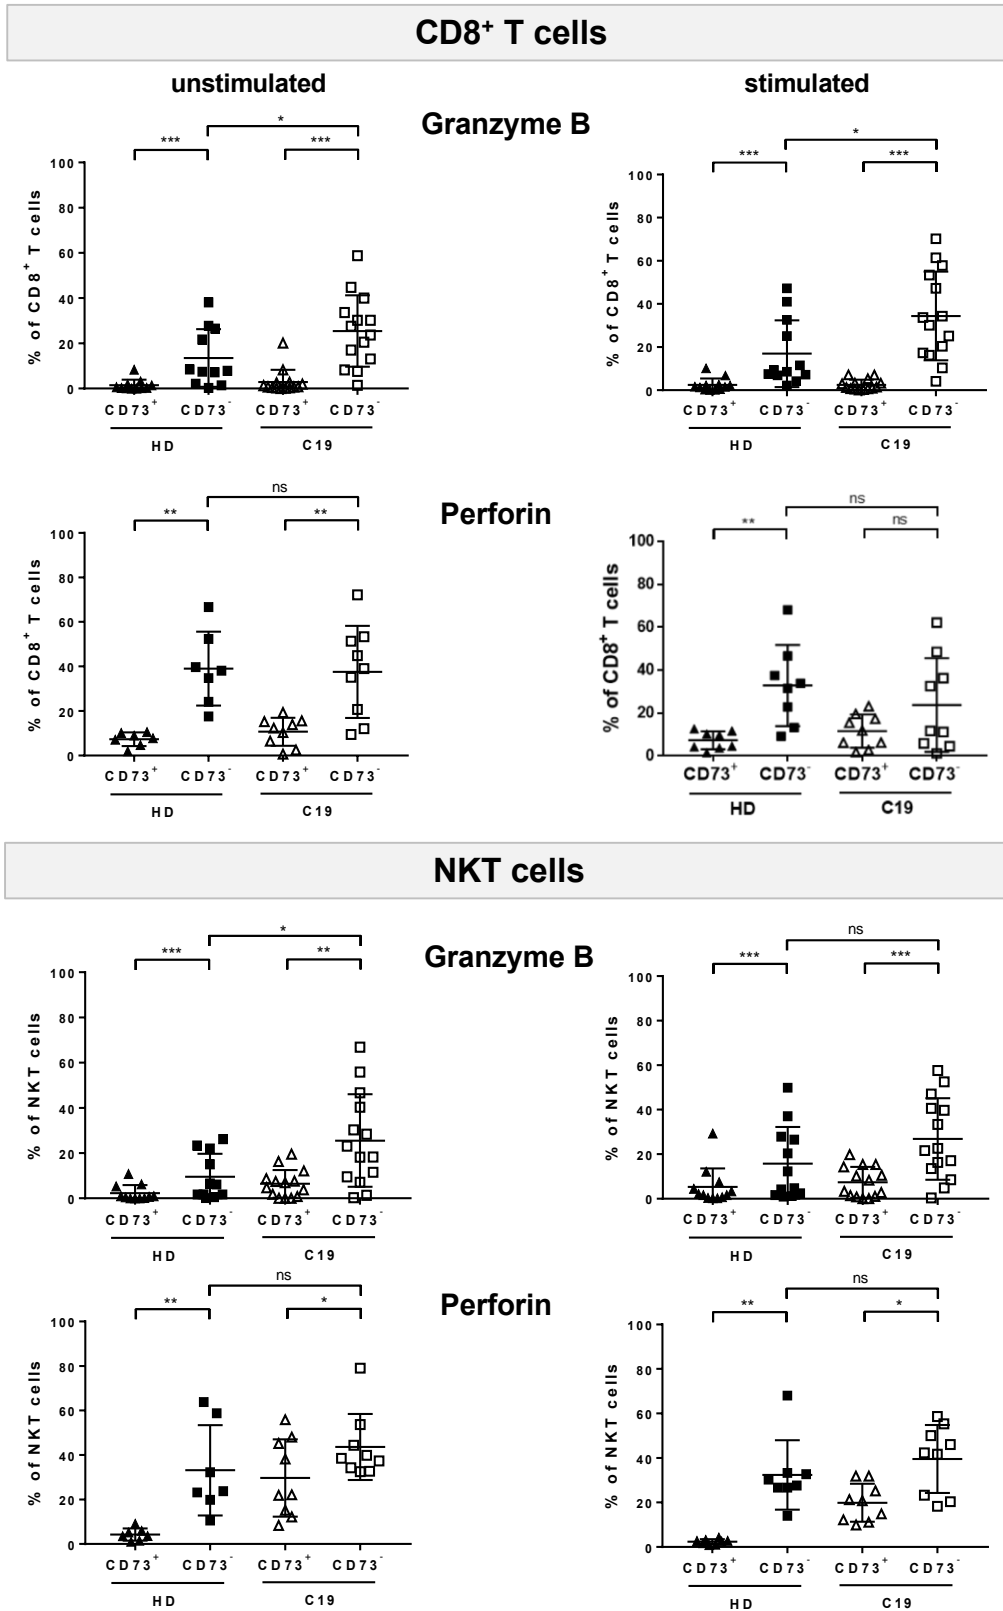

**Supplementary Figure S6:** Secretion of Granzyme B and perforin by unstimulated CD73<sup>-</sup>CD8<sup>+</sup> T and CD73<sup>-</sup>NKT cells and their CD73<sup>+</sup> counterparts in COVID-19 (C19) patients and healthy donors (HD). Data are shown as mean ± SD.

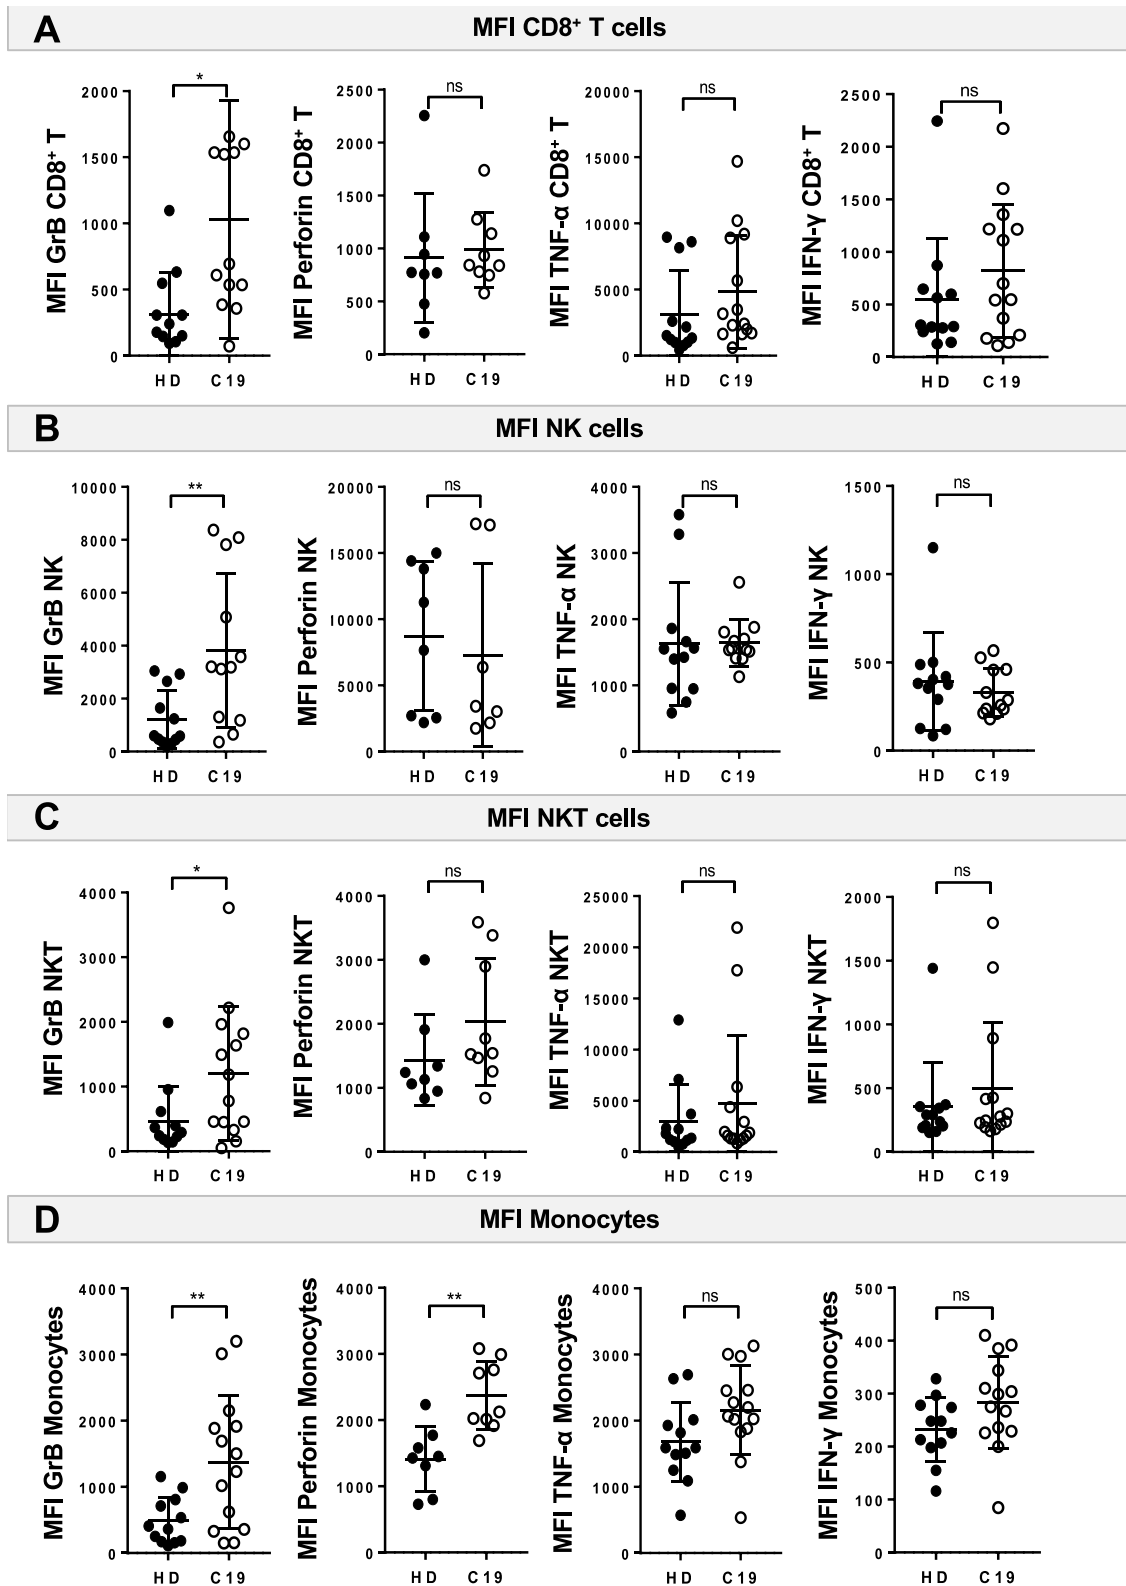

**Supplementary Figure S7:** Median fluorescence intensity (MFI) of Granzyme B (GrB), perforin, TNF- $\alpha$  and IFN- $\gamma$  in CD8<sup>+</sup> T cells (A), NK cells (B), NKT cells (C) and monocytes (D) in COVID-19 (C19) patients and healthy donors (HD). Data are shown as mean  $\pm$  SD.

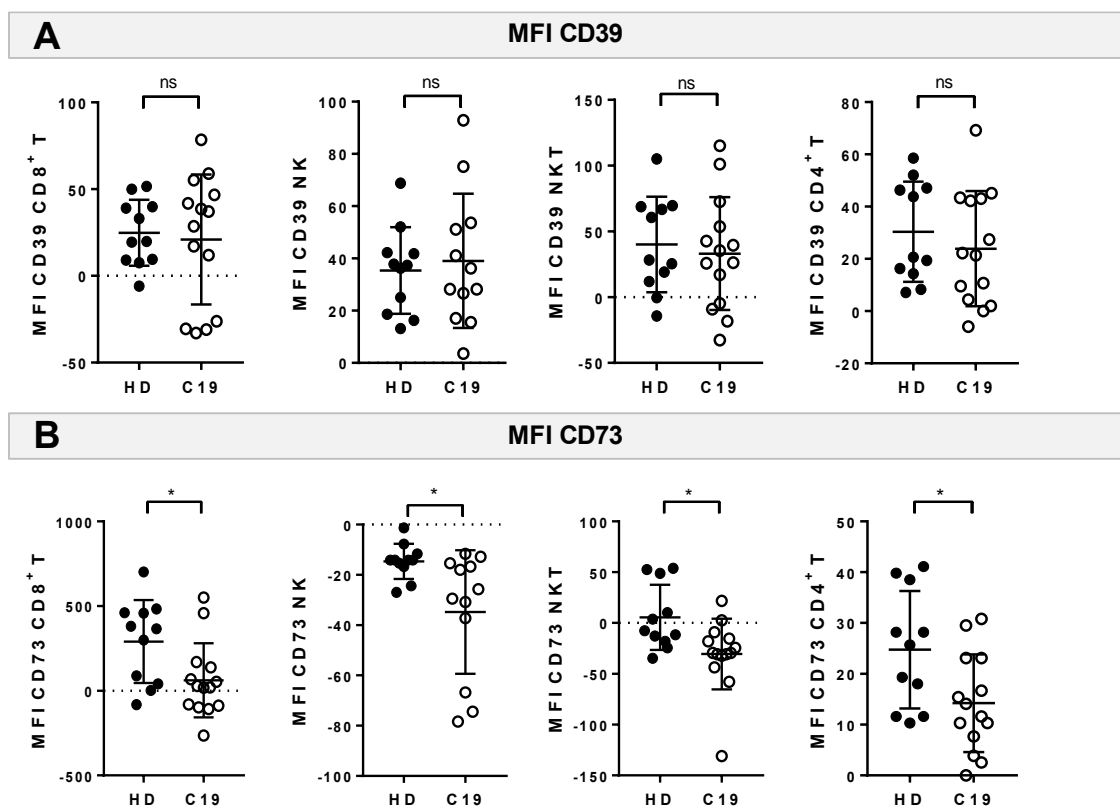

**Supplementary Figure S8:** Median fluorescence intensity (MFI) of CD39 and CD73 on different lymphocyte subsets. PBMC from COVID-19 (C19) patients and healthy donors (HD) were analyzed ex vivo by flow cytometry. Data are shown as mean  $\pm$  SD.

### A Gating Strategy NK cells

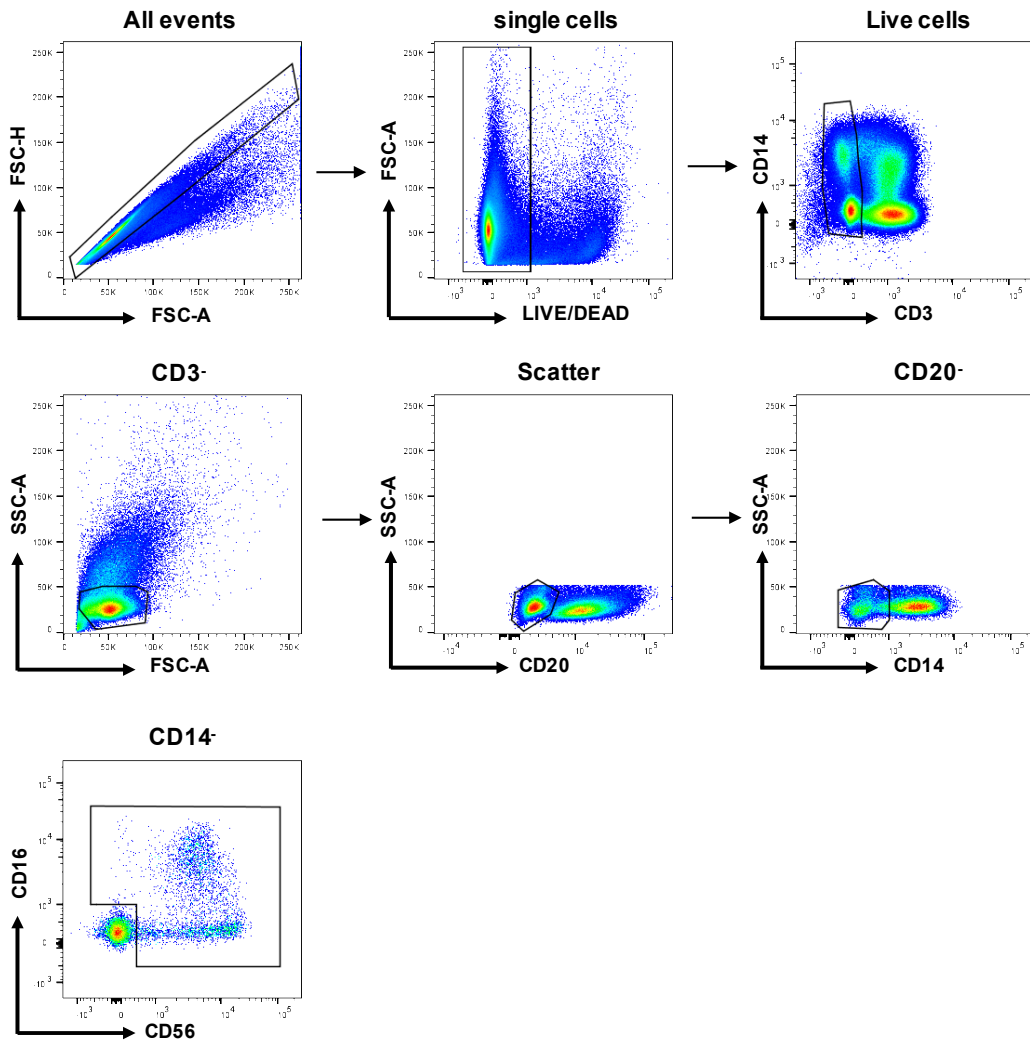



### B Gating Strategy NKT cells

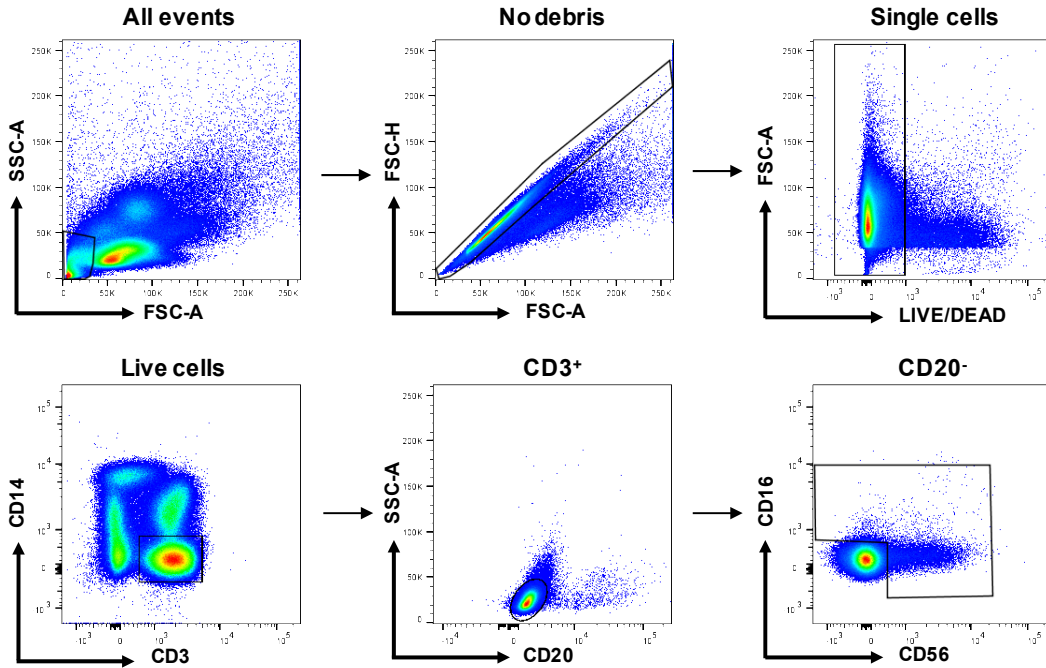

### C Gating Strategy CD4<sup>+</sup>/CD8<sup>+</sup> T cells

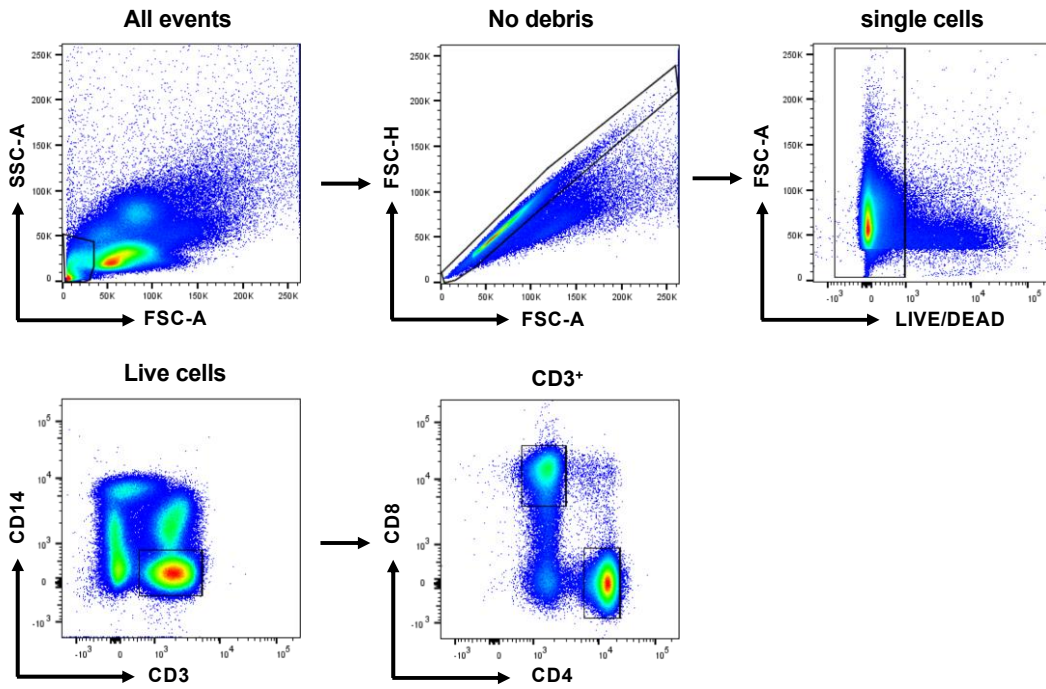

## D Gating Strategy Cytokines/Toxins

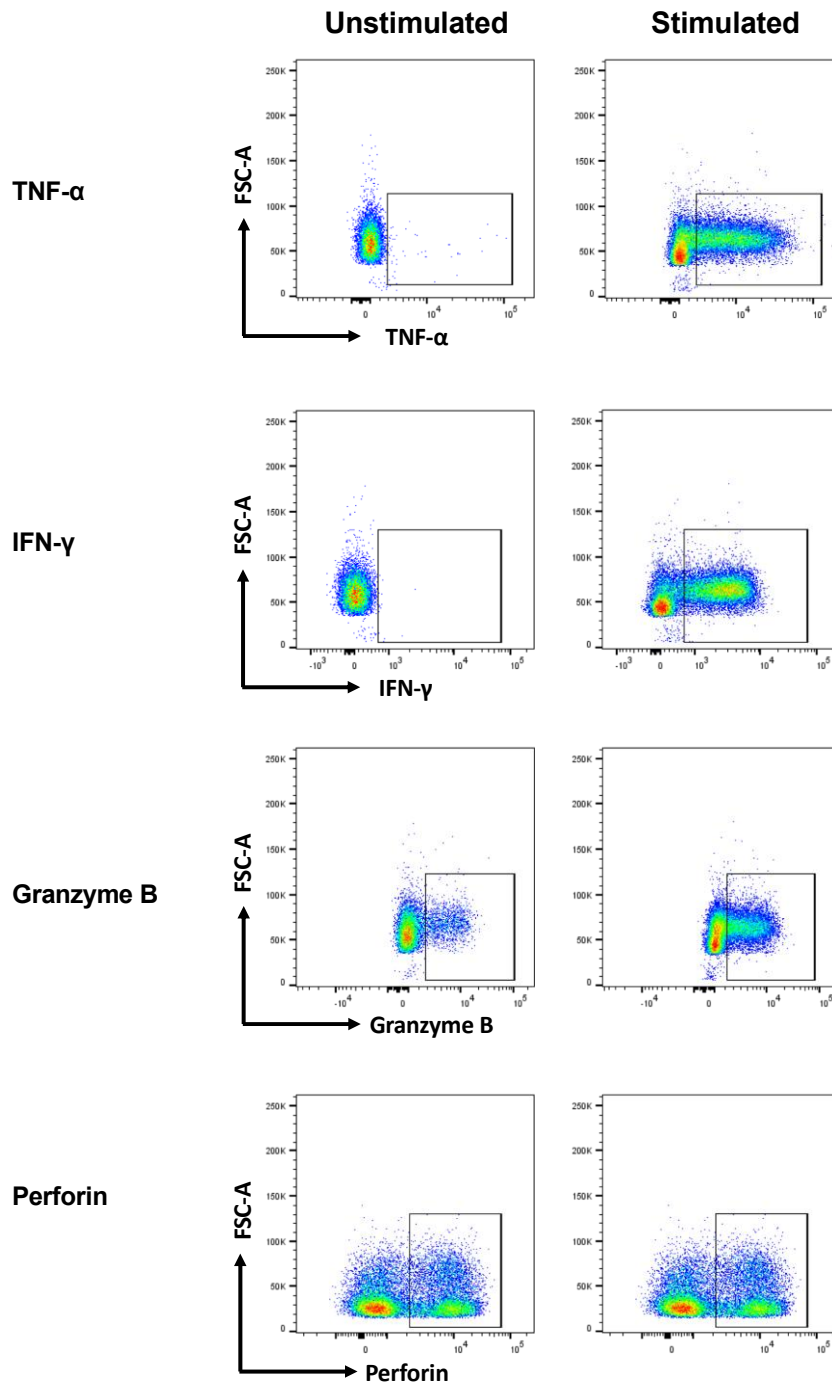

**Supplementary Figure S9:** Gating strategy to define NK cells (A), NKT cells (B) and CD4<sup>+</sup>/CD8<sup>+</sup> T cells (C). The gates used to define TNF- $\alpha$ , IFN- $\gamma$ , Granzyme B and perforin-producing cells are shown for representative examples of unstimulated and stimulated CD8<sup>+</sup> T cells from a COVID-19 patient (D).
